# Supplementary material
Source: HighWire-hosted journal article supplement (https://bmjopensem.bmj.com/content/suppl/2023/03/20/9.1.e001487)
Supplement: bmjsem-2022-001487supp001_data_supplement.pdf [file bmjsem-2022-001487supp001_data_supplement.pdf]

## Questionnaire: Clinician/Practitioner working with people with spinal cord injury

### Demographics

1. What is your nationality?

2. What is your age?

3. What is your job role? (*Put an X next to the best option*)

|                          |  |
|--------------------------|--|
| Medical doctor           |  |
| Physiotherapist          |  |
| Nurse                    |  |
| Occupational therapist   |  |
| Rehabilitation therapist |  |

4. How many years of experience do you have in this role?

The following questions relate to **AEROBIC** exercise.

Exercise prescription is characterised by the *Frequency* (i.e. *times per week*), *Intensity*, *Time* (duration of a session), and the *Type of exercise*.

5. Rank these aspects in order of importance when conducting **AEROBIC** exercise? (1 = most important, 4 = least important. Write the appropriate number in the box next to the description)

|                        |  |
|------------------------|--|
| <b>Frequency</b>       |  |
| <b>Intensity</b>       |  |
| <b>Time (duration)</b> |  |
| <b>Type</b>            |  |

6. For each of these aspects, how **often** do you consider these when conducting **AEROBIC** exercise? (Put an X in each row under your answer)

|                  | <b>Never</b> | <b>Rarely</b> | <b>Sometimes</b> | <b>Often</b> | <b>Always</b> |
|------------------|--------------|---------------|------------------|--------------|---------------|
| <b>Frequency</b> |              |               |                  |              |               |
| <b>Intensity</b> |              |               |                  |              |               |
| <b>Time</b>      |              |               |                  |              |               |
| <b>Type</b>      |              |               |                  |              |               |

7. When performing **AEROBIC** exercise, how often do you have a target intensity for that session? (Put an X in the box under your answer)

| <b>Never</b> | <b>Rarely</b> | <b>Sometimes</b> | <b>Often</b> | <b>Always</b> |
|--------------|---------------|------------------|--------------|---------------|
|              |               |                  |              |               |

There are lots of methods for prescribing **AEROBIC** exercise intensity.

8. What is your **AWARENESS** of using each of these measures for prescribing **AEROBIC** exercise intensity? (Put an X in each row under your answer)

|                                     | <b>Never</b> | <b>Rarely</b> | <b>Sometimes</b> | <b>Often</b> | <b>Always</b> |
|-------------------------------------|--------------|---------------|------------------|--------------|---------------|
| <b>Oxygen uptake</b>                |              |               |                  |              |               |
| <b>Heart rate</b>                   |              |               |                  |              |               |
| <b>Blood lactate concentration</b>  |              |               |                  |              |               |
| <b>Rating of perceived exertion</b> |              |               |                  |              |               |
| <b>Talk Test</b>                    |              |               |                  |              |               |
| <b>Feeling Scale</b>                |              |               |                  |              |               |
| <b>Power output</b>                 |              |               |                  |              |               |
| <b>Speed</b>                        |              |               |                  |              |               |

9. How **FREQUENTLY** do you use each of these measures for prescribing **AEROBIC** exercise intensity? (*Put an X in each row under your answer*)

|                                     | <b>Never</b> | <b>Rarely</b> | <b>Sometimes</b> | <b>Often</b> | <b>Always</b> |
|-------------------------------------|--------------|---------------|------------------|--------------|---------------|
| <b>Oxygen uptake</b>                |              |               |                  |              |               |
| <b>Heart rate</b>                   |              |               |                  |              |               |
| <b>Blood lactate concentration</b>  |              |               |                  |              |               |
| <b>Rating of perceived exertion</b> |              |               |                  |              |               |
| <b>Talk Test</b>                    |              |               |                  |              |               |
| <b>Feeling Scale</b>                |              |               |                  |              |               |
| <b>Power output</b>                 |              |               |                  |              |               |
| <b>Speed</b>                        |              |               |                  |              |               |

10. How **IMPORTANT** do you think each of these measures are for prescribing **AEROBIC** exercise intensity? (*Put an X in each row under your answer*)

|                                     | <b>Not at all</b> | <b>Slightly</b> | <b>Moderately</b> | <b>Very</b> | <b>Extremely</b> |
|-------------------------------------|-------------------|-----------------|-------------------|-------------|------------------|
| <b>Oxygen uptake</b>                |                   |                 |                   |             |                  |
| <b>Heart rate</b>                   |                   |                 |                   |             |                  |
| <b>Blood lactate concentration</b>  |                   |                 |                   |             |                  |
| <b>Rating of perceived exertion</b> |                   |                 |                   |             |                  |
| <b>Talk Test</b>                    |                   |                 |                   |             |                  |
| <b>Feeling Scale</b>                |                   |                 |                   |             |                  |
| <b>Power output</b>                 |                   |                 |                   |             |                  |
| <b>Speed</b>                        |                   |                 |                   |             |                  |

11. How **USEFUL** do you think each of these measures are for prescribing **AEROBIC** exercise intensity? (*Put an X in each row under your answer*)

|                                     | <b>Not at all</b> | <b>Slightly</b> | <b>Moderately</b> | <b>Very</b> | <b>Extremely</b> |
|-------------------------------------|-------------------|-----------------|-------------------|-------------|------------------|
| <b>Oxygen uptake</b>                |                   |                 |                   |             |                  |
| <b>Heart rate</b>                   |                   |                 |                   |             |                  |
| <b>Blood lactate concentration</b>  |                   |                 |                   |             |                  |
| <b>Rating of perceived exertion</b> |                   |                 |                   |             |                  |
| <b>Talk Test</b>                    |                   |                 |                   |             |                  |
| <b>Feeling Scale</b>                |                   |                 |                   |             |                  |
| <b>Power output</b>                 |                   |                 |                   |             |                  |
| <b>Speed</b>                        |                   |                 |                   |             |                  |

There are lots of cues that a person could use for monitoring their **AEROBIC** exercise intensity

12. What is your **AWARENESS** of using each of these for monitoring **AEROBIC** exercise intensity? (*Put an X in each row under your answer*)

|                           | Not at all | Slightly | Moderately | Very | Extremely |
|---------------------------|------------|----------|------------|------|-----------|
| Heart rate                |            |          |            |      |           |
| Breathing rate            |            |          |            |      |           |
| Breathing depth           |            |          |            |      |           |
| Sweat rate                |            |          |            |      |           |
| Body temperature          |            |          |            |      |           |
| Skin temperature          |            |          |            |      |           |
| Muscle temperature        |            |          |            |      |           |
| Ability to talk           |            |          |            |      |           |
| Enjoyment level           |            |          |            |      |           |
| Affect (feeling good/bad) |            |          |            |      |           |
| Concentration level       |            |          |            |      |           |
| Attentional focus         |            |          |            |      |           |

13. How **FREQUENTLY** do you use each of these for monitoring **AEROBIC** exercise intensity? (*Put an X in each row under your answer*)

|                           | Not at all | Slightly | Moderately | Very | Extremely |
|---------------------------|------------|----------|------------|------|-----------|
| Heart rate                |            |          |            |      |           |
| Breathing rate            |            |          |            |      |           |
| Breathing depth           |            |          |            |      |           |
| Sweat rate                |            |          |            |      |           |
| Body temperature          |            |          |            |      |           |
| Skin temperature          |            |          |            |      |           |
| Muscle temperature        |            |          |            |      |           |
| Ability to talk           |            |          |            |      |           |
| Enjoyment level           |            |          |            |      |           |
| Affect (feeling good/bad) |            |          |            |      |           |
| Concentration level       |            |          |            |      |           |
| Attentional focus         |            |          |            |      |           |

14. How **IMPORTANT** do you think each of these for monitoring **AEROBIC** exercise intensity? (*Put an X in each row under your answer*)

|                           | Not at all | Slightly | Moderately | Very | Extremely |
|---------------------------|------------|----------|------------|------|-----------|
| Heart rate                |            |          |            |      |           |
| Breathing rate            |            |          |            |      |           |
| Breathing depth           |            |          |            |      |           |
| Sweat rate                |            |          |            |      |           |
| Body temperature          |            |          |            |      |           |
| Skin temperature          |            |          |            |      |           |
| Muscle temperature        |            |          |            |      |           |
| Ability to talk           |            |          |            |      |           |
| Enjoyment level           |            |          |            |      |           |
| Affect (feeling good/bad) |            |          |            |      |           |
| Concentration level       |            |          |            |      |           |
| Attentional focus         |            |          |            |      |           |

15. How **USEFUL** do you think each of these are for measuring **AEROBIC** exercise intensity? (*Put an X in each row under your answer*)

|                           | Not at all | Slightly | Moderately | Very | Extremely |
|---------------------------|------------|----------|------------|------|-----------|
| Heart rate                |            |          |            |      |           |
| Breathing rate            |            |          |            |      |           |
| Breathing depth           |            |          |            |      |           |
| Sweat rate                |            |          |            |      |           |
| Body temperature          |            |          |            |      |           |
| Skin temperature          |            |          |            |      |           |
| Muscle temperature        |            |          |            |      |           |
| Ability to talk           |            |          |            |      |           |
| Enjoyment level           |            |          |            |      |           |
| Affect (feeling good/bad) |            |          |            |      |           |
| Concentration level       |            |          |            |      |           |
| Attentional focus         |            |          |            |      |           |

Exercise guidelines for people with spinal cord injury recommend people perform “**moderate**” to “**vigorous**” intensity exercise.

16. How **USEFUL** are the terms “moderate” and “vigorous” for prescribing **AEROBIC** exercise intensity? (*Put an X in each row under your answer*)

|          | Not at all | Slightly | Moderately | Very | Extremely |
|----------|------------|----------|------------|------|-----------|
| Moderate |            |          |            |      |           |
| Vigorous |            |          |            |      |           |

17. How **APPROPRIATE** are the terms “moderate” and “vigorous” for prescribing **AEROBIC** exercise intensity? (*Put an X in each row under your answer*)

|                 | <b>Not at all</b> | <b>Slightly</b> | <b>Moderately</b> | <b>Very</b> | <b>Extremely</b> |
|-----------------|-------------------|-----------------|-------------------|-------------|------------------|
| <b>Moderate</b> |                   |                 |                   |             |                  |
| <b>Vigorous</b> |                   |                 |                   |             |                  |

18. Do the terms “moderate” and “vigorous” provide enough information for prescribing a suitable **AEROBIC** intensity? (*Put an X in each row under your answer*)

|                 | <b>Not at all</b> | <b>Slightly</b> | <b>Moderately</b> | <b>Very</b> | <b>Extremely</b> |
|-----------------|-------------------|-----------------|-------------------|-------------|------------------|
| <b>Moderate</b> |                   |                 |                   |             |                  |
| <b>Vigorous</b> |                   |                 |                   |             |                  |

19. Of the following statements, select those which **you** associate with **moderate** intensity **AEROBIC** exercise. (*Put an X in the box next to those that apply, otherwise leave blank*)

|                                             |  |                                                   |  |                                             |  |
|---------------------------------------------|--|---------------------------------------------------|--|---------------------------------------------|--|
| Activities require very light work          |  | Breathing is normal                               |  | You're working hard, almost at your maximum |  |
| Heart rate stays normal, or a bit increased |  | Skin might be sweaty                              |  | Muscles are loose and relaxed               |  |
| You will require some concentration         |  | You're working a little bit, but not too hard     |  | Skin isn't sweaty                           |  |
| Heart rate is much faster than normal       |  | You can hold a normal conversation                |  | You might feel very alert                   |  |
| Muscles burn, are tight and tense           |  | Heart rate is faster than normal, but not extreme |  | Breathing is faster than normal             |  |
| Activities require some physical effort     |  | You can speak 1 or 2 sentences                    |  | You're working somewhat hard                |  |
| Skin is a little sweaty                     |  | Skin is a little warmer than usual                |  | Muscle feel worked                          |  |
| Speaking more than a few words is difficult |  | Breathing is much faster than normal              |  | Skin is normal temperature                  |  |
| Skin is much warmer than normal             |  | Activities require a lot of physical effort       |  | You require full concentration              |  |
| Muscles aren't tired                        |  | No concentration is required                      |  | Muscles feel much warmer than usual         |  |

20. Of the following statements, select those which **you** associate with **vigorous** intensity **AEROBIC** exercise. (Put an X in the box next to those that apply, otherwise leave blank)

|                                             |  |                                                   |  |                                             |  |
|---------------------------------------------|--|---------------------------------------------------|--|---------------------------------------------|--|
| Activities require very light work          |  | Breathing is normal                               |  | You're working hard, almost at your maximum |  |
| Heart rate stays normal, or a bit increased |  | Skin might be sweaty                              |  | Muscles are loose and relaxed               |  |
| You will require some concentration         |  | You're working a little bit, but not too hard     |  | Skin isn't sweaty                           |  |
| Heart rate is much faster than normal       |  | You can hold a normal conversation                |  | You might feel very alert                   |  |
| Muscles burn, are tight and tense           |  | Heart rate is faster than normal, but not extreme |  | Breathing is faster than normal             |  |
| Activities require some physical effort     |  | You can speak 1 or 2 sentences                    |  | You're working somewhat hard                |  |
| Skin is a little sweaty                     |  | Skin is a little warmer than usual                |  | Muscle feel worked                          |  |
| Speaking more than a few words is difficult |  | Breathing is much faster than normal              |  | Skin is normal temperature                  |  |
| Skin is much warmer than normal             |  | Activities require a lot of physical effort       |  | You require full concentration              |  |
| Muscles aren't tired                        |  | No concentration is required                      |  | Muscles feel much warmer than usual         |  |
